# Supplementary material
Source: PubMed Central journal article supplement (PMC8204658)
Supplement: eurheartj_41_12_1249_s7.pdf [file eurheartj_41_12_1249_s7.pdf]

## SUPPLEMENTAL MATERIAL

For the manuscript entitled

### **Routinely Reported Ejection Fraction and Mortality in Clinical Practice: Where Does the Nadir of Risk Lie?**

Gregory J. Wehner, PhD<sup>a</sup>; Linyuan Jing, PhD<sup>b,c</sup>; Christopher M. Haggerty, PhD<sup>b,c</sup>; Jonathan D. Suever, PhD<sup>b,c</sup>; Joseph B. Leader, BA<sup>c</sup>; Dustin N. Hartzel, BS<sup>c</sup>; H. Lester Kirchner, PhD<sup>c</sup>; Joseph N. A. Manus<sup>c</sup>, BS; Nick James;<sup>d</sup> Zina Ayar;<sup>e</sup> Patrick Gladding, MD, PhD<sup>d</sup>; Christopher W. Good, DO<sup>f</sup>; John G.F. Cleland, MD, PhD<sup>g</sup>; Brandon K. Fornwalt, MD, PhD<sup>b,c,f,h\*</sup>

<sup>a</sup>Department of Biomedical Engineering, University of Kentucky, Lexington, KY, United States

<sup>b</sup>Department of Imaging Science and Innovation, Geisinger, Danville, PA, United States

<sup>c</sup>Biomedical and Translational Informatics Institute, Geisinger, Danville, PA, United States

<sup>d</sup>Department of Cardiology, Waitemata District Health Board, Auckland, New Zealand

<sup>e</sup>Clinical Informatics Service, Waitemata District Health Board, Auckland, New Zealand

<sup>f</sup>Heart Institute, Geisinger, Danville, PA, United States

<sup>g</sup>Robertson Centre for Biostatistics and Clinical Trials, University of Glasgow and National Heart & Lung Institute, Imperial College London, London, UK

<sup>h</sup>Department of Radiology, Geisinger, Danville, PA, United States

## Table of Contents

LVEF Reporting Page 3

Independent New Zealand dataset Page 3

Figures Page 4

Figure S1. Unadjusted LVEF Hazard Ratios in Both the Primary (N = 403,977) and Validation (N = 45,531) datasets.

Figure S2. Confounder and LVEF Hazard Ratios Using Only the First Echocardiogram from Each Patient (N = 203,135).

Figure S3. Confounder and LVEF Hazard Ratios when Excluding Echocardiograms with Indeterminate LVEF Inequalities as well as Echocardiograms Performed on Pediatrics Patients and Patients with Congenital Heart or Great Vessel Defects (N = 384,329).

Figure S4. Confounder and LVEF Hazard Ratios in the Subgroup of Echocardiograms with at Least 90 Days of Follow-up (N = 342,220).

Figure S5. Analysis with Interactions between LVEF and Exam Setting in the Primary Dataset (Number of Echocardiograms = 403,977).

Figure S6. Confounder and LVEF Hazard Ratios from the Exploratory Echocardiographic Dataset (N = 219,278).

Figure S7. Adjusted Hazard Ratios from the Interaction between LVEF and ESVi in the Exploratory Echocardiographic Dataset (Number of Echocardiograms = 203,627).

Figure S8. Adjusted Hazard Ratios from the Interaction between LVEF and EDVi in the Exploratory Echocardiographic Dataset (Number of Echocardiograms = 215,318).

Figure S9. LVEF Adjusted Hazard Ratios Further Adjusted for NT-proBNP in Patients with Heart Failure (Number of Echocardiograms = 13,599).

Tables Page 11

Table S1. ICD-10 Codes for Each Diagnosis

Table S2. Baseline Patient Characteristics for the Primary Group and the Group without Reported LVEF

Table S3. Baseline Patient Characteristics for the Primary Group for each LVEF Interval

Table S4. Indications for Echocardiography in the Primary Group

Table S5. Baseline Characteristics for the First Echocardiogram from Each Patient in the Primary Group

Table S6. Baseline Characteristics for each LVEF Interval in Patients with Heart Failure

## **LVEF Reporting**

LVEF was reported in any of three ways: a single number, a range (e.g. 40-45%), or an inequality (e.g. <20%). To align with the common intervals and inequalities, all LVEFs were categorized into intervals that were 5% wide and inclusive of the lower endpoint. The lowest and highest intervals were <20% and  $\geq 70\%$ , respectively. Reports with indeterminate inequalities were classified in the adjacent interval (e.g. <30% was categorized as 25-30%). For the small number of echocardiograms with multiple reported LVEFs, the mean was taken.

Of the 403,977 echocardiograms in the primary group, 297,287 (74%) had LVEF reported as a range. LVEF was reported as an inequality for 16,373 (4%) echocardiograms. Of those inequalities, only 3,328 (0.82% of the whole) were an indeterminate inequality (e.g. <30%). LVEF was reported as a single number for 90,317 (22%) echocardiograms.

## **Independent New Zealand dataset**

Waitemata District Health Board is the largest regional district health provider in New Zealand, serving a population of 630,000 people. Mortality was recorded in this population using centralised government databases, from Statistics New Zealand (Tatauranga Aotearoa). Statistics New Zealand is the principal agency responsible for processing and publishing vital statistics in New Zealand, including death statistics. Under the provisions of the New Zealand Births, Deaths, Marriages, and Relationships Registration Act 1995, every death occurring in New Zealand must be registered. Mortality was censored from January 2018.

The mean age of the validation dataset was 63.1 years (SD, 17.3). The echocardiograms were acquired between 2008 – 2017 and included 45,531 echocardiograms from 35,976 patients. Death occurred in 4,781 patients (13.3%) who had 6375 echocardiograms (14.8%). The median follow-up time based on the reverse Kaplan-Meier method was 3.2 years (IQR, 1.9 – 4.7).

Figure S1 below demonstrates a similar u-shaped relationship for the unadjusted hazard ratios from the validation dataset. The confidence intervals for the validation dataset were generally wider due to its smaller sample size. Kaplan-Meier estimators demonstrated a similar ability to stratify survival based on LVEF. The validation dataset generally had better survival compared to the primary dataset for any given LVEF.

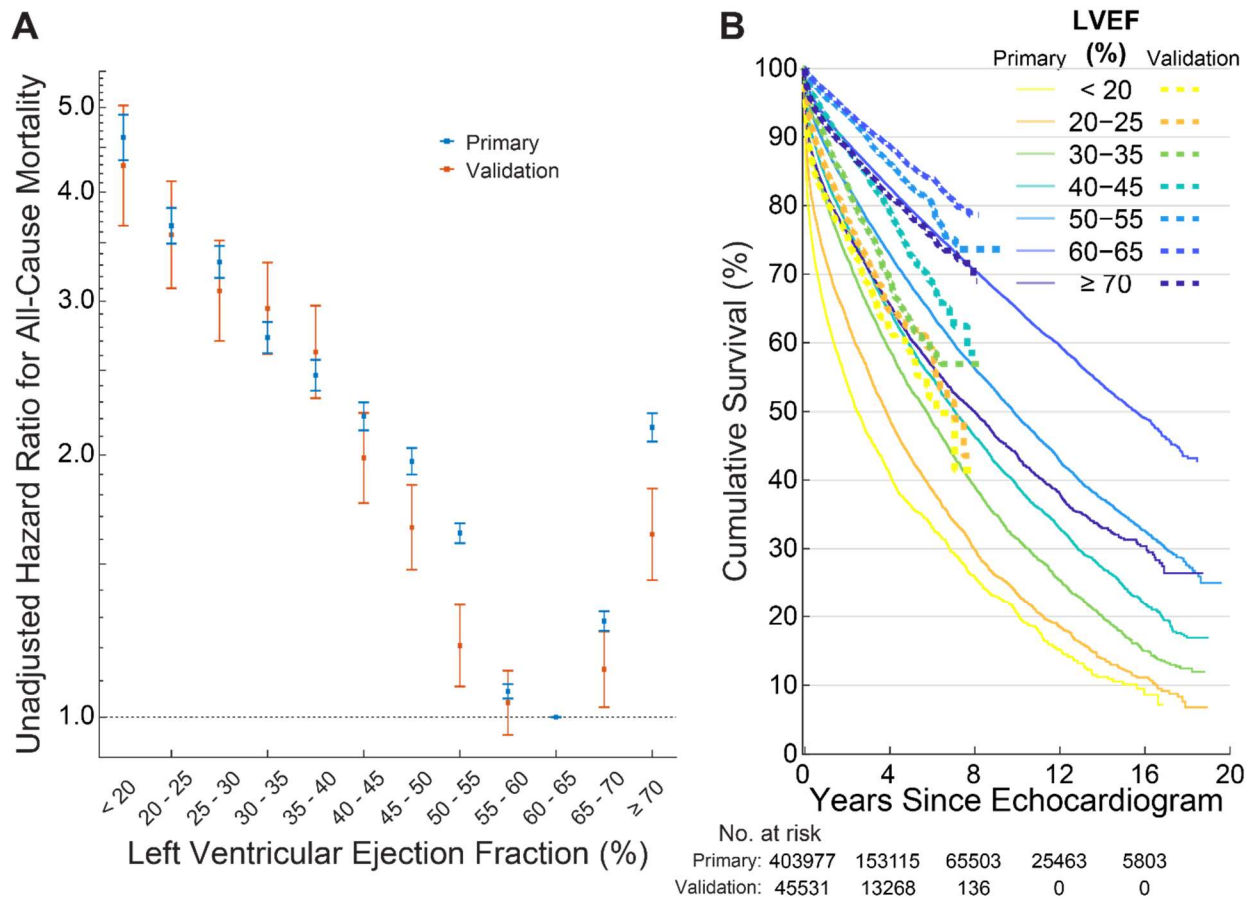

**Figure S1. Unadjusted LVEF Hazard Ratios in Both the Primary (N = 403,977) and Validation (N = 45,531) datasets.** LVEF, left ventricular ejection fraction. LVEF intervals are inclusive of the lower endpoint. **A)** The unadjusted hazard ratios for both the primary and validation datasets had u-shaped relationships. **B)** Unadjusted Kaplan Meier estimators illustrate the ability of LVEF to stratify survival in both datasets.

| Characteristic                 | Adjusted Hazard Ratio<br>(95% CI) |
|--------------------------------|-----------------------------------|
| <b>Age, y</b>                  |                                   |
| <18                            | 0.04 (0.01-0.13)                  |
| 18 - 30                        | 0.33 (0.30-0.37)                  |
| 30 - 40                        | 0.37 (0.34-0.41)                  |
| 40 - 50                        | 0.54 (0.51-0.57)                  |
| 50 - 60                        | 1.00 (referent)                   |
| 60 - 70                        | 1.74 (1.69-1.81)                  |
| 70 - 80                        | 3.08 (2.98-3.18)                  |
| ≥80                            | 6.00 (5.79-6.22)                  |
| <b>BMI, kg/m<sup>2</sup></b>   |                                   |
| <18.5                          | 1.95 (1.84-2.07)                  |
| 18.5 - 25                      | 1.00 (referent)                   |
| 25 - 30                        | 0.71 (0.70-0.73)                  |
| 30 - 35                        | 0.67 (0.65-0.69)                  |
| 35 - 40                        | 0.73 (0.70-0.75)                  |
| ≥40                            | 0.91 (0.87-0.94)                  |
| <b>Date of Echocardiogram</b>  |                                   |
| <2002                          | 0.58 (0.56-0.61)                  |
| 2002 - 2005                    | 0.70 (0.67-0.72)                  |
| 2005 - 2008                    | 0.81 (0.78-0.83)                  |
| 2008 - 2011                    | 0.89 (0.86-0.92)                  |
| 2011 - 2014                    | 0.91 (0.89-0.94)                  |
| ≥2014                          | 1.00 (referent)                   |
| Height (per 10 cm)             | 0.93 (0.92-0.94)                  |
| Male sex                       | 1.36 (1.32-1.39)                  |
| Previous Myocardial Infarction | 0.96 (0.92-1.00)                  |
| Hypertension                   | 1.00 (0.98-1.02)                  |
| Diabetes                       | 1.56 (1.53-1.60)                  |
| Atrial Fibrillation            | 1.18 (1.15-1.22)                  |
| Congenital Defect              | 0.81 (0.76-0.86)                  |
| Dyslipidemia                   | 0.68 (0.66-0.69)                  |
| Chronic Kidney Disease         | 1.42 (1.37-1.46)                  |
| Heart Failure                  | 1.47 (1.42-1.52)                  |
| Positive Smoking History       | 1.20 (1.18-1.22)                  |
| <b>LVEF, %</b>                 |                                   |
| <20                            | 3.04 (2.80-3.29)                  |
| 20 - 25                        | 2.59 (2.42-2.76)                  |
| 25 - 30                        | 2.31 (2.18-2.46)                  |
| 30 - 35                        | 2.00 (1.89-2.12)                  |
| 35 - 40                        | 1.90 (1.80-2.00)                  |
| 40 - 45                        | 1.79 (1.71-1.88)                  |
| 45 - 50                        | 1.59 (1.51-1.66)                  |
| 50 - 55                        | 1.39 (1.34-1.44)                  |
| 55 - 60                        | 1.06 (1.03-1.08)                  |
| 60 - 65                        | 1.00 (referent)                   |
| 65 - 70                        | 1.19 (1.15-1.24)                  |
| ≥70                            | 1.69 (1.61-1.78)                  |

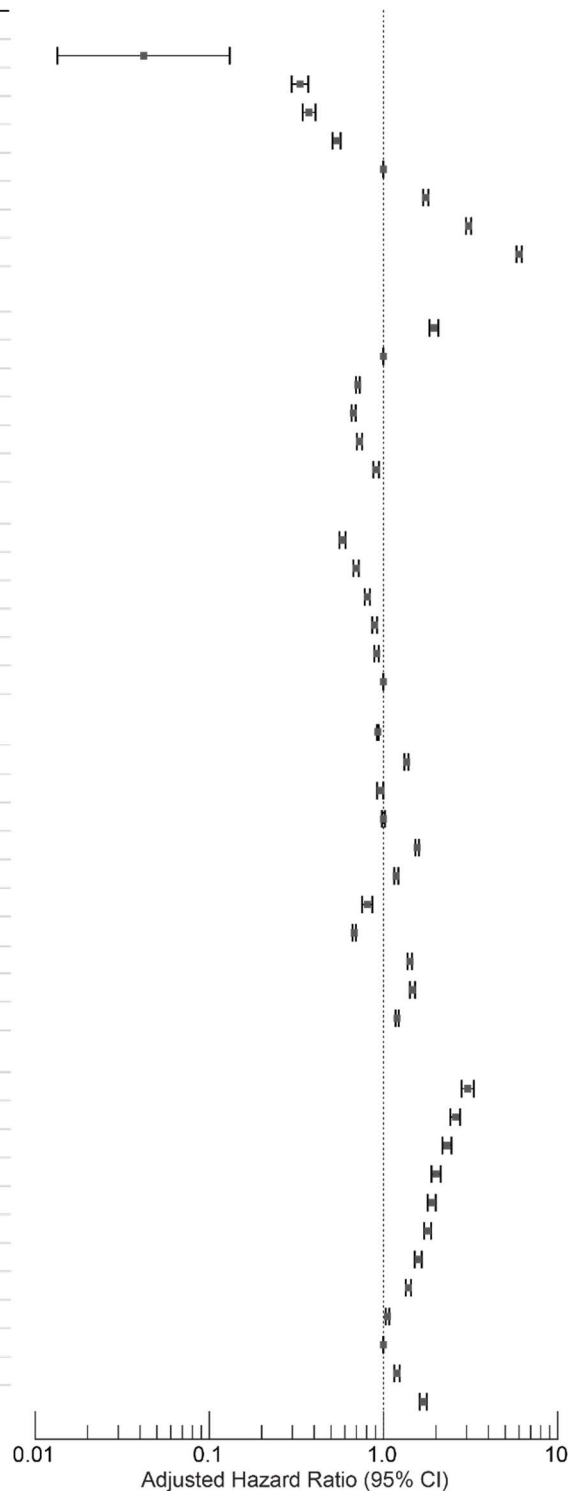

**Figure S2. Confounder and LVEF Hazard Ratios Using Only the First Echocardiogram from Each Patient (N = 203,135).** LVEF, left ventricular ejection fraction. LVEF intervals are inclusive of the lower endpoint.

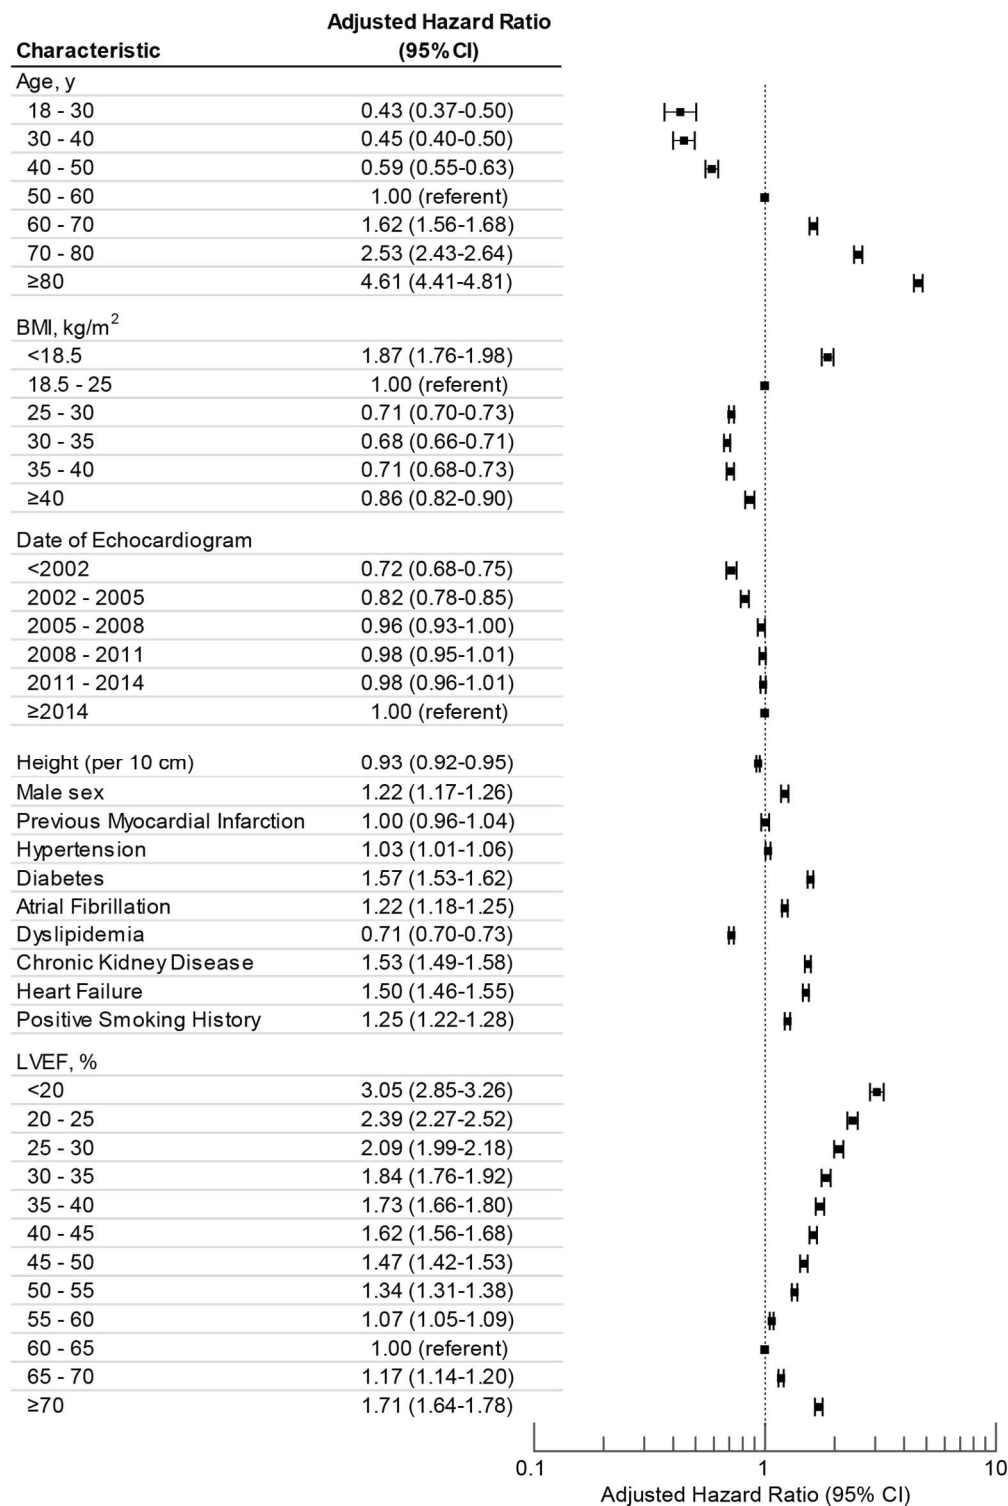

**Figure S3. Confounder and LVEF Hazard Ratios when Excluding Echocardiograms with Indeterminate LVEF Inequalities as well as Echocardiograms Performed on Pediatrics Patients and Patients with Congenital Heart or Great Vessel Defects (N = 384,329).** LVEF, left ventricular ejection fraction. LVEF intervals are inclusive of the lower endpoint.

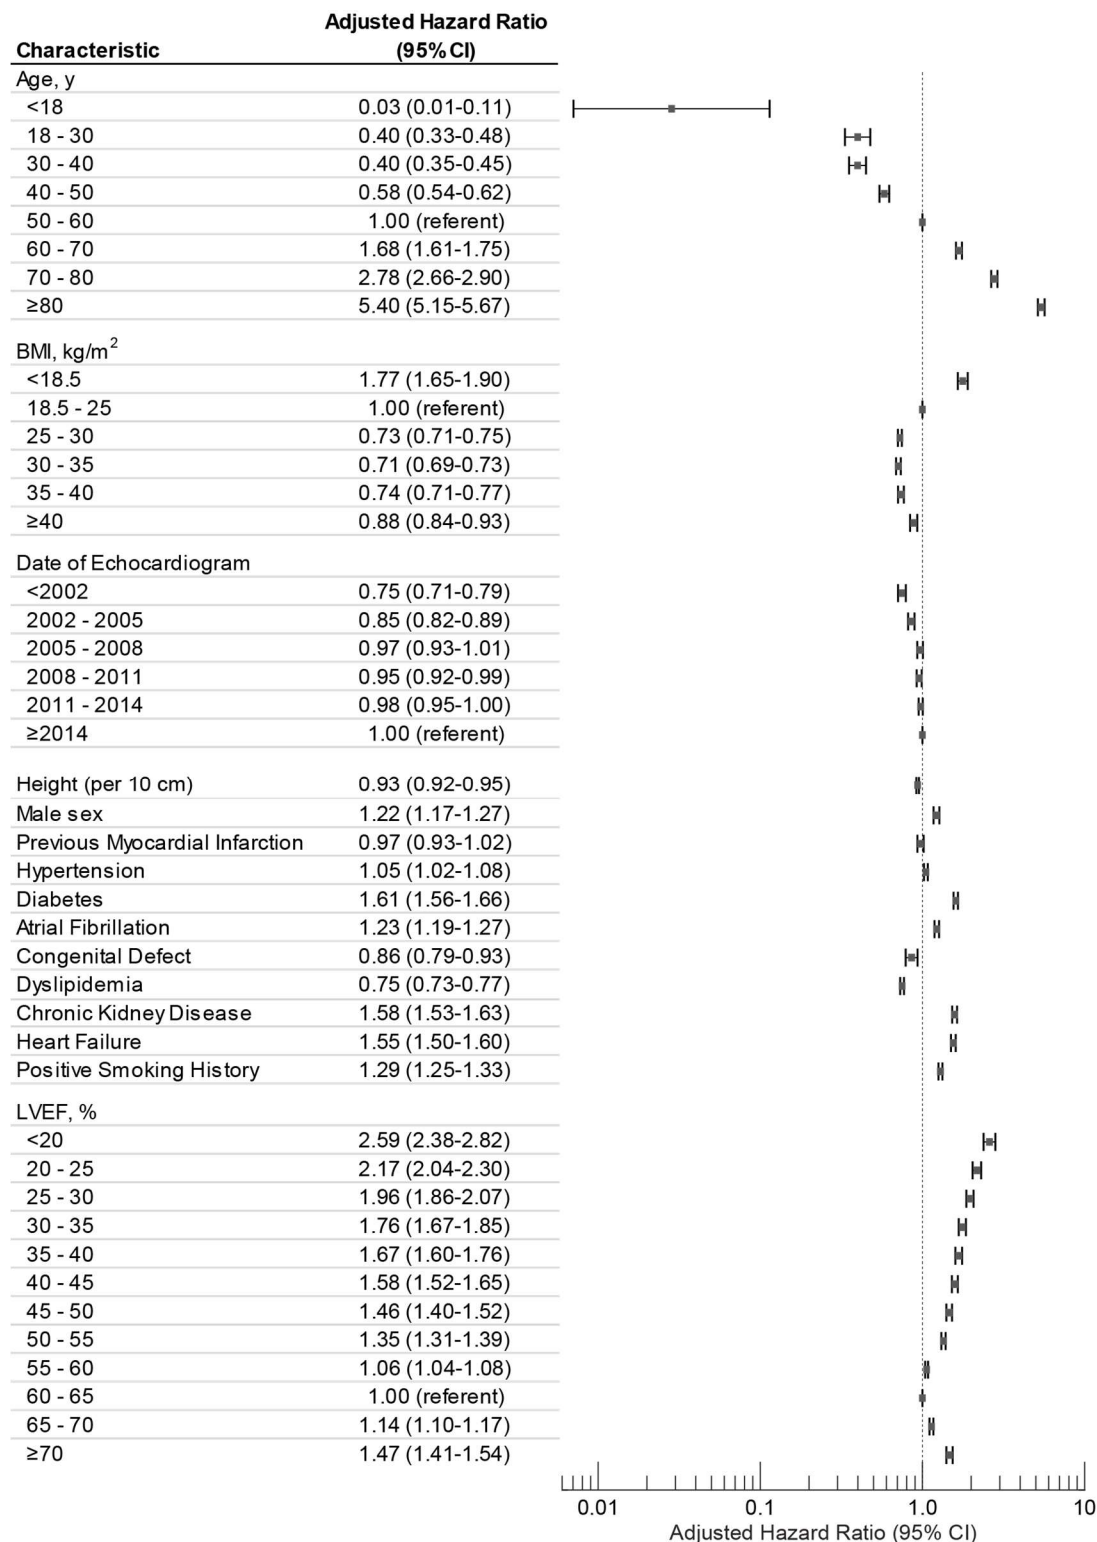

**Figure S4. Confounder and LVEF Hazard Ratios in the Subgroup of Echocardiograms with at Least 90 Days of Follow-up (N = 342,220).** LVEF, left ventricular ejection fraction. LVEF intervals are inclusive of the lower endpoint.

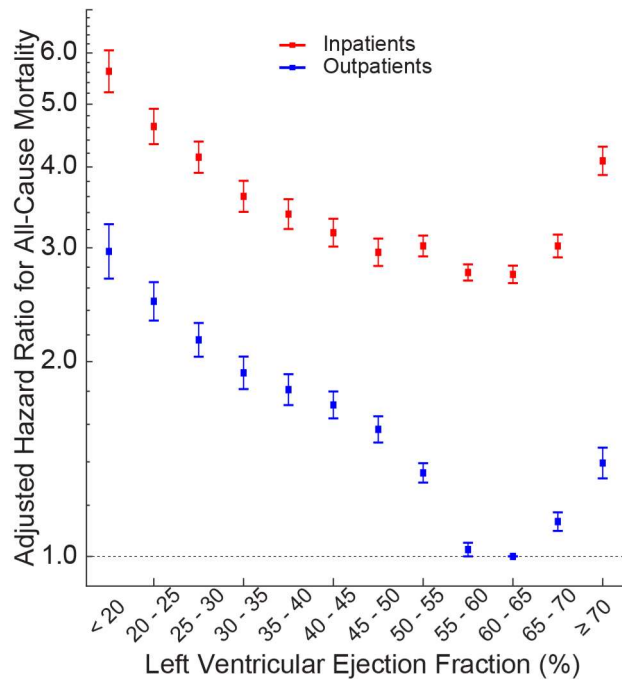

**Figure S5. Analysis with Interactions between LVEF and Exam Setting in the Primary Dataset (Number of Echocardiograms = 403,977).** LVEF, left ventricular ejection fraction. LVEF intervals are inclusive of the lower threshold. The referent group was “Outpatients with LVEF of 60-65%”.



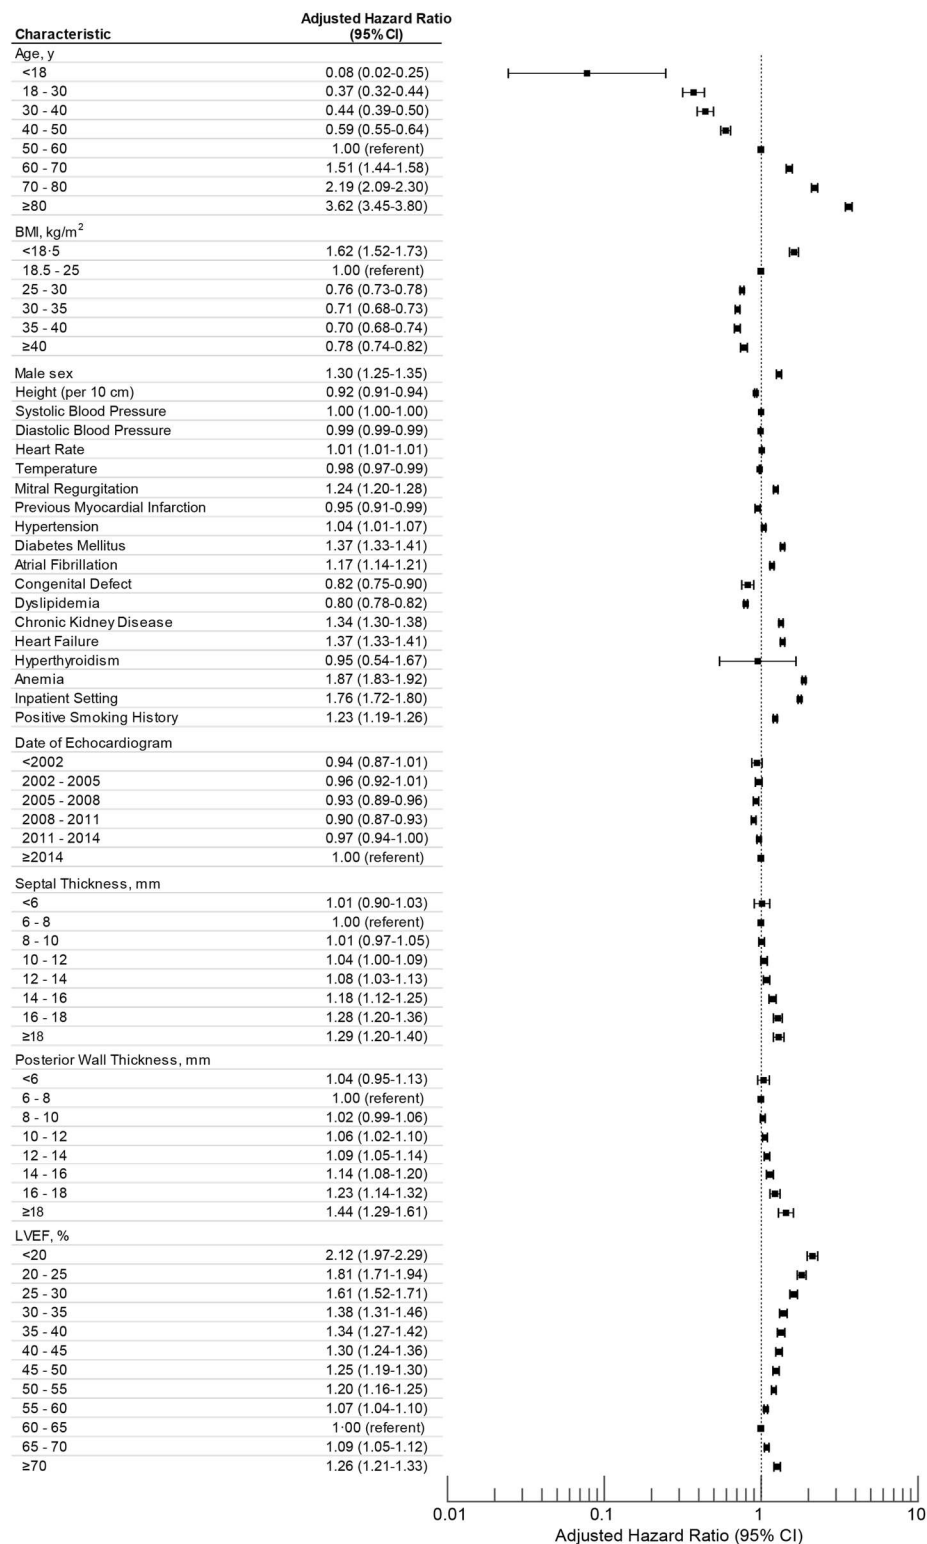

**Figure S6. Confounder and LVEF Hazard Ratios from the Exploratory Echocardiographic Dataset (N = 219,278).** LVEF, left ventricular ejection fraction. LVEF intervals are inclusive of the lower endpoint. Additional confounders include systolic and diastolic blood pressure, heart rate, temperature, mitral regurgitation, anemia (hemoglobin < 10 g/dL), hyperthyroidism (TSH < 0.10 mIU/L), and septal and posterior wall thicknesses.

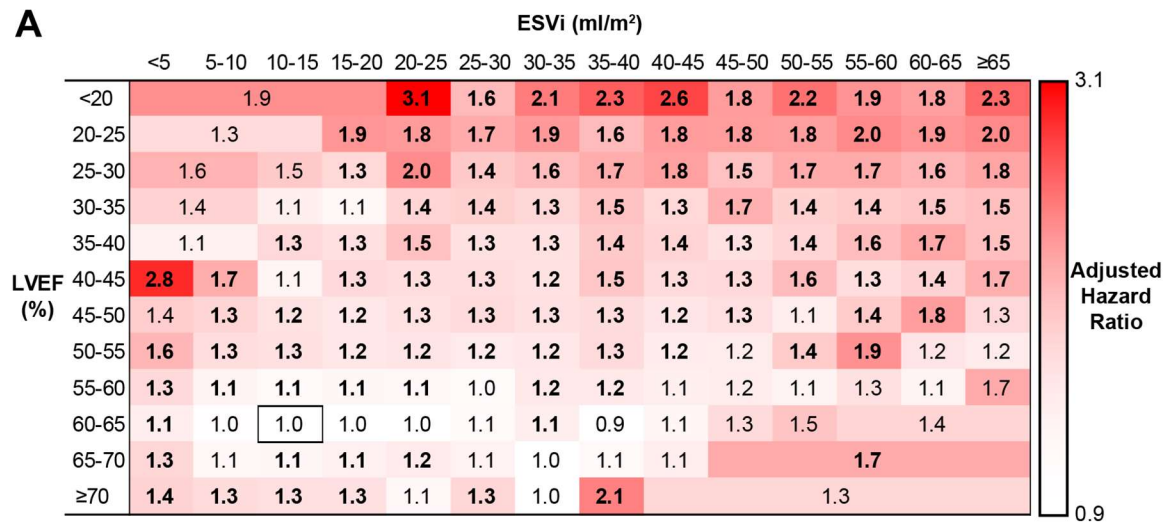

**B**

ESVi (ml/m<sup>2</sup>)

|          | <5 | 5-10 | 10-15 | 15-20 | 20-25 | 25-30 | 30-35 | 35-40 | 40-45 | 45-50 | 50-55 | 55-60 | 60-65 | ≥65  |     |
|----------|----|------|-------|-------|-------|-------|-------|-------|-------|-------|-------|-------|-------|------|-----|
| <20      |    | 20   |       |       | 20    | 49    | 51    | 85    | 101   | 125   | 137   | 143   | 158   | 1695 |     |
| 20-25    |    | 29   |       | 41    | 57    | 119   | 166   | 199   | 237   | 282   | 288   | 289   | 278   | 1524 |     |
| 25-30    |    | 29   | 50    | 116   | 175   | 258   | 323   | 368   | 419   | 437   | 396   | 376   | 332   | 1072 |     |
| 30-35    |    | 44   | 105   | 178   | 284   | 419   | 515   | 570   | 548   | 522   | 461   | 335   | 305   | 603  |     |
| 35-40    |    | 62   | 204   | 388   | 488   | 633   | 720   | 654   | 634   | 472   | 360   | 236   | 148   | 323  |     |
| LVEF (%) |    |      |       |       |       |       |       |       |       |       |       |       |       |      |     |
| 40-45    |    | 16   | 132   | 349   | 666   | 956   | 1175  | 1051  | 914   | 734   | 518   | 321   | 191   | 123  | 176 |
| 45-50    |    | 27   | 187   | 623   | 1108  | 1449  | 1390  | 1240  | 850   | 575   | 302   | 193   | 127   | 59   | 75  |
| 50-55    |    | 99   | 1024  | 3001  | 4504  | 4574  | 3331  | 2055  | 1157  | 635   | 314   | 137   | 74    | 43   | 42  |
| 55-60    |    | 601  | 6883  | 16298 | 17655 | 12320 | 6657  | 3060  | 1388  | 604   | 247   | 111   | 71    | 34   | 41  |
| 60-65    |    | 829  | 8038  | 16439 | 14573 | 8052  | 3664  | 1416  | 597   | 237   | 117   | 51    |       | 40   |     |
| 65-70    |    | 591  | 4233  | 6572  | 4391  | 1995  | 881   | 341   | 130   | 58    |       |       | 44    |      |     |
| ≥70      |    | 604  | 2564  | 2241  | 1106  | 379   | 176   | 67    | 27    |       |       | 32    |       |      |     |

**Figure S7. Adjusted Hazard Ratios from the Interaction between LVEF and ESVi in the Exploratory Echocardiographic Dataset (Number of Echocardiograms = 203,627).** LVEF, left ventricular ejection fraction. ESVi, left ventricular end systolic volume index. LVEF intervals are inclusive of the lower endpoint. Additional confounders include systolic and diastolic blood pressure, heart rate, temperature, mitral regurgitation, anemia (hemoglobin < 10 g/dL), hyperthyroidism (TSH < 0.10 mIU/L), and septal and posterior wall thicknesses. **(A)** Bold values are significantly different from the boxed “1.0” reference interval (P < 0.05). Adjacent intervals were merged as needed to encompass at least 10 instances of mortality. **(B)** The number of echocardiograms in each group.

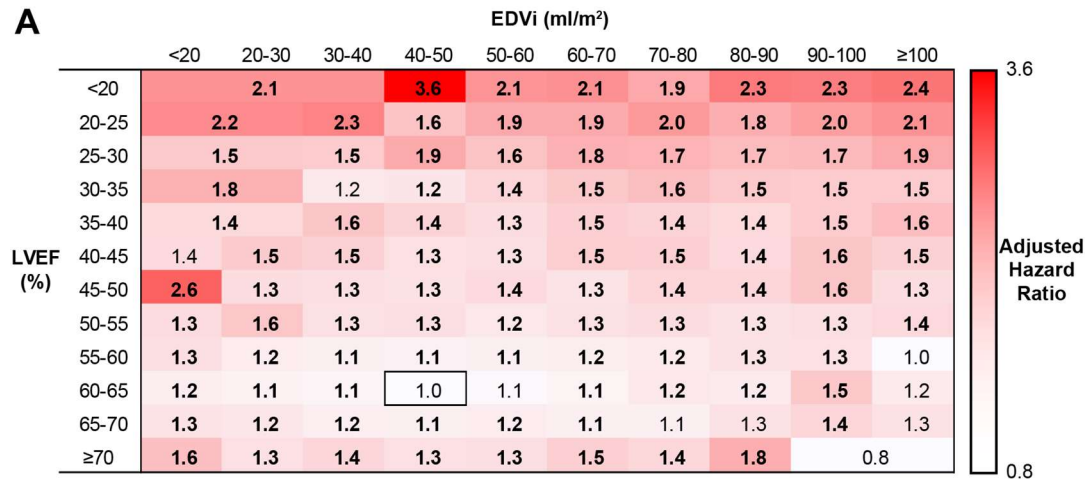

**B**

|          |       | EDVi (ml/m <sup>2</sup> ) |       |       |       |       |       |       |       |        |      |
|----------|-------|---------------------------|-------|-------|-------|-------|-------|-------|-------|--------|------|
|          |       | <20                       | 20-30 | 30-40 | 40-50 | 50-60 | 60-70 | 70-80 | 80-90 | 90-100 | ≥100 |
| LVEF (%) | <20   |                           | 41    |       | 81    | 173   | 212   | 325   | 318   | 306    | 1425 |
|          | 20-25 |                           | 23    | 81    | 221   | 282   | 424   | 542   | 519   | 492    | 1224 |
|          | 25-30 |                           | 46    | 168   | 337   | 521   | 743   | 737   | 689   | 519    | 903  |
|          | 30-35 |                           | 97    | 230   | 496   | 736   | 954   | 908   | 658   | 487    | 623  |
|          | 35-40 |                           | 144   | 364   | 704   | 1023  | 1088  | 884   | 628   | 347    | 424  |
|          | 40-45 | 34                        | 189   | 640   | 1273  | 1595  | 1531  | 1111  | 665   | 383    | 321  |
|          | 45-50 | 38                        | 340   | 966   | 1605  | 1927  | 1662  | 1067  | 579   | 243    | 220  |
|          | 50-55 | 290                       | 1629  | 3689  | 5175  | 4981  | 3531  | 1860  | 755   | 317    | 204  |
|          | 55-60 | 973                       | 6216  | 14072 | 18447 | 15405 | 8966  | 3667  | 1280  | 419    | 217  |
|          | 60-65 | 911                       | 5447  | 12087 | 15885 | 12416 | 6497  | 2422  | 731   | 238    | 150  |
|          | 65-70 | 477                       | 2458  | 5069  | 5415  | 3885  | 1815  | 651   | 196   | 74     | 51   |
|          | ≥70   | 387                       | 1515  | 2185  | 1901  | 1053  | 469   | 188   | 77    | 39     |      |

**Figure S8. Adjusted Hazard Ratios from the Interaction between LVEF and EDVi in the Exploratory Echocardiographic Dataset (Number of Echocardiograms = 215,318).** LVEF, left ventricular ejection fraction. EDVi, left ventricular end diastolic volume index. LVEF intervals are inclusive of the lower endpoint. Additional confounders include systolic and diastolic blood pressure, heart rate, temperature, mitral regurgitation, anemia (hemoglobin < 10 g/dL), hyperthyroidism (TSH < 0.10 mIU/L), and septal and posterior wall thicknesses. **(A)** Bold values are significantly different from the boxed “1.0” reference interval (P < 0.05). Adjacent intervals were merged as needed to encompass at least 10 instances of mortality. **(B)** The number of echocardiograms in each group.

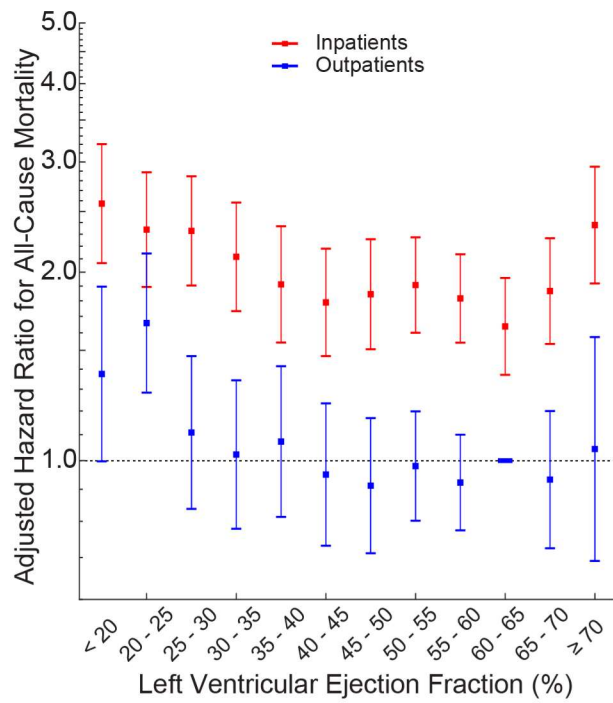

**Figure S9. LVEF Adjusted Hazard Ratios Further Adjusted for NT-proBNP in Patients with Heart Failure (Number of Echocardiograms = 13,599).** LVEF, left ventricular ejection fraction. LVEF intervals are inclusive of the lower threshold. Error bars represent the 95% confidence interval. The referent group was “Outpatients with LVEF of 60-65%”.

**Table S1. ICD-10 Codes for Each Diagnosis**

| Diagnosis                      | ICD-10 Codes                      |
|--------------------------------|-----------------------------------|
| Previous Myocardial Infarction | I21, I22, I23, I25.2              |
| Hypertension                   | I10, I11, I12, I13, I14, I15      |
| Diabetes Mellitus              | E08, E09, E10, E11, E12, E13      |
| Atrial Fibrillation            | I48                               |
| Congenital Defect              | Q20, Q21, Q22, Q23, Q24, Q25, Q26 |
| Dyslipidemia                   | E78.0, E78.2, E78.4, E78.5        |
| Chronic Kidney Disease         | N18                               |
| Heart Failure                  | I50                               |

Abbreviations: ICD-10, *International Classification of Disease, Tenth Edition*

**Table S2. Baseline Patient Characteristics for the Primary Group and the Group without Reported LVEF**

| <b>Characteristic</b>                            | <b>Primary Group,<br/>No. (%)<br/>(N = 403977)</b> | <b>Missing LVEF Group,<br/>No. (%)<br/>(N = 178371)</b> | <b>Standardized<br/>Difference</b> |
|--------------------------------------------------|----------------------------------------------------|---------------------------------------------------------|------------------------------------|
| Age, mean (SD), y                                | 63.8 (15.9)                                        | 61.6 (17.1)                                             | 0.14                               |
| Male                                             | 208408 (52)                                        | 90720 (51)                                              | 0.02                               |
| BMI, mean (SD), kg/m <sup>2</sup>                | 30.5 (7.8)                                         | 30.5 (8.5)                                              | 0.01                               |
| Date of Echocardiogram                           |                                                    |                                                         |                                    |
| Q1                                               | 16-Sep-2009                                        | 12-July-2006                                            |                                    |
| Median                                           | 29-Nov-2013                                        | 13-Dec-2010                                             |                                    |
| Q3                                               | 7-Sep-2016                                         | 24-Feb-2014                                             |                                    |
| Previous Myocardial Infarction                   | 38085 (9)                                          | 8854 (5)                                                | 0.18                               |
| Hypertension                                     | 196742 (49)                                        | 55355 (31)                                              | 0.37                               |
| Diabetes Mellitus                                | 91464 (23)                                         | 25612 (14)                                              | 0.22                               |
| Atrial Fibrillation                              | 65866 (16)                                         | 17250 (10)                                              | 0.20                               |
| Congenital Heart Defect                          | 16110 (4)                                          | 7256 (4)                                                | 0.00                               |
| Dyslipidemia                                     | 176109 (44)                                        | 49793 (28)                                              | 0.33                               |
| Chronic Kidney Disease                           | 55092 (14)                                         | 10305 (6)                                               | 0.27                               |
| Heart Failure                                    | 52192 (13)                                         | 12754 (7)                                               | 0.19                               |
| Positive Smoking History                         | 232951 (58)                                        | 99397 (56)                                              | 0.04                               |
| Hazard Ratio for Mortality (95% CI) <sup>a</sup> | 1.24 (1.22-1.26)                                   | 1.00 (referent)                                         |                                    |

Abbreviations: BMI, body mass index calculated as weight in kilograms divided by height in meters squared; LVEF, left ventricular ejection fraction; CI, confidence interval

<sup>a</sup>Unadjusted hazard ratio for the primary group vs. the missing LVEF group.

**Table S3. Baseline Patient Characteristics for the Primary Group for each LVEF Interval**

| Characteristic                      | LVEF<br>< 20<br>No. (%)<br>(N = 5205) | LVEF<br>20 - 25<br>No. (%)<br>(N = 7202) | LVEF<br>25 - 30<br>No. (%)<br>(N = 8814) | LVEF<br>30 - 35<br>No. (%)<br>(N = 9726) | LVEF<br>35 - 40<br>No. (%)<br>(N = 10595) | LVEF<br>40 - 45<br>No. (%)<br>(N = 14478) | LVEF<br>45 - 50<br>No. (%)<br>(N = 15889) | LVEF<br>50 - 55<br>No. (%)<br>(N = 41859) | LVEF<br>55 - 60<br>No. (%)<br>(N = 138705) | LVEF<br>60 - 65<br>No. (%)<br>(N = 103433) | LVEF<br>65 - 70<br>No. (%)<br>(N = 34508) | LVEF<br>≥ 70<br>No. (%)<br>(N = 13563) |
|-------------------------------------|---------------------------------------|------------------------------------------|------------------------------------------|------------------------------------------|-------------------------------------------|-------------------------------------------|-------------------------------------------|-------------------------------------------|--------------------------------------------|--------------------------------------------|-------------------------------------------|----------------------------------------|
| No. of Unique Patients <sup>a</sup> | 3515                                  | 5138                                     | 6470                                     | 7360                                     | 8206                                      | 11064                                     | 12574                                     | 32882                                     | 99140                                      | 76856                                      | 28983                                     | 11509                                  |
| Age, mean (SD), y                   | 66.2 (14.1)                           | 68.0 (13.4)                              | 69.0 (13.1)                              | 68.4 (13.4)                              | 68.5 (13.6)                               | 67.9 (14.0)                               | 67.1 (14.3)                               | 65.0 (15.8)                               | 61.9 (16.2)                                | 62.3 (16.2)                                | 64.9 (16.1)                               | 67.6 (15.5)                            |
| Male Sex                            | 3806 (73)                             | 5029 (70)                                | 6088 (69)                                | 6498 (67)                                | 7152 (68)                                 | 9634 (67)                                 | 10427 (66)                                | 25179 (60)                                | 69145 (50)                                 | 46351 (45)                                 | 14082 (41)                                | 5017 (37)                              |
| BMI, mean (SD), kg/m <sup>2</sup>   | 29.0 (7.7)                            | 29.2 (7.1)                               | 29.7 (7.7)                               | 29.8 (8.1)                               | 29.9 (8.0)                                | 29.9 (7.5)                                | 30.2 (7.7)                                | 30.7 (8.0)                                | 30.8 (7.8)                                 | 30.5 (7.7)                                 | 30.6 (8.0)                                | 30.4 (8.2)                             |
| Previous Myocardial Infarction      | 1154 (22)                             | 1794 (25)                                | 2269 (26)                                | 2492 (26)                                | 2632 (25)                                 | 3410 (24)                                 | 3305 (21)                                 | 5281 (13)                                 | 8970 (6)                                   | 4669 (5)                                   | 1444 (4)                                  | 665 (5)                                |
| Hypertension                        | 2447 (47)                             | 3578 (50)                                | 4626 (52)                                | 5138 (53)                                | 5664 (53)                                 | 7607 (53)                                 | 8365 (53)                                 | 21166 (51)                                | 64793 (47)                                 | 48165 (47)                                 | 17649 (51)                                | 7544 (56)                              |
| Diabetes Mellitus                   | 1689 (32)                             | 2520 (35)                                | 2995 (34)                                | 3193 (33)                                | 3324 (31)                                 | 4138 (29)                                 | 4434 (28)                                 | 10290 (25)                                | 28044 (20)                                 | 19992 (19)                                 | 7501 (22)                                 | 3344 (25)                              |
| Atrial Fibrillation                 | 1486 (29)                             | 1952 (27)                                | 2357 (27)                                | 2524 (26)                                | 2641 (25)                                 | 3675 (25)                                 | 3908 (25)                                 | 9180 (22)                                 | 19466 (14)                                 | 12358 (12)                                 | 4364 (13)                                 | 1955 (14)                              |
| Congenital Heart Defect             | 109 (2)                               | 201 (3)                                  | 223 (3)                                  | 263 (3)                                  | 326 (3)                                   | 491 (3)                                   | 534 (3)                                   | 1664 (4)                                  | 5775 (4)                                   | 4592 (4)                                   | 1389 (4)                                  | 543 (4)                                |
| Dyslipidemia                        | 2246 (43)                             | 3290 (46)                                | 4202 (48)                                | 4728 (49)                                | 5062 (48)                                 | 6868 (47)                                 | 7695 (48)                                 | 19014 (45)                                | 58535 (42)                                 | 43016 (42)                                 | 15230 (44)                                | 6223 (46)                              |
| Chronic Kidney Disease              | 1248 (24)                             | 1645 (23)                                | 2010 (23)                                | 2105 (22)                                | 2100 (20)                                 | 2722 (19)                                 | 2890 (18)                                 | 6528 (16)                                 | 16042 (12)                                 | 10960 (11)                                 | 4640 (13)                                 | 2202 (16)                              |
| Heart Failure                       | 2907 (56)                             | 3508 (49)                                | 3845 (44)                                | 3707 (38)                                | 3422 (32)                                 | 3822 (26)                                 | 3583 (23)                                 | 6201 (15)                                 | 10493 (8)                                  | 6436 (6)                                   | 2834 (8)                                  | 1434 (11)                              |
| Positive Smoking History            | 3537 (68)                             | 4832 (67)                                | 5839 (66)                                | 6488 (67)                                | 6803 (64)                                 | 9344 (65)                                 | 10262 (65)                                | 25539 (61)                                | 78730 (57)                                 | 55688 (54)                                 | 18353 (53)                                | 7536 (56)                              |

<sup>a</sup>The sum of the number of unique patients across the LVEF intervals is larger than the overall number of unique patients because patients with multiple echocardiograms can appear in multiple LVEF intervals  
Abbreviations: BMI, body mass index calculated as weight in kilograms divided by height in meters squared; LVEF, left ventricular ejection fraction

**Table S4. Indications for Echocardiography in the Primary Group**

| <b>Indication/Diagnosis<sup>a</sup></b>       | <b>No. of<br/>Echocardiograms<sup>b</sup></b> | <b>%</b> |
|-----------------------------------------------|-----------------------------------------------|----------|
| Chest Pain                                    | 62370                                         | 15.4     |
| Dyspnea / Fatigue                             | 51111                                         | 12.7     |
| Coronary Artery Disease                       | 41487                                         | 10.3     |
| Aortic Valve Disease                          | 37147                                         | 9.2      |
| Congestive Heart Failure                      | 31786                                         | 7.9      |
| Atrial Fibrillation                           | 28835                                         | 7.1      |
| Stroke / Transient Ischemic Attack            | 20300                                         | 5.0      |
| Syncope / Orthostatic hypotension / Dizziness | 17097                                         | 4.2      |
| Hypertension                                  | 15323                                         | 3.8      |
| Mitral Valve Disease                          | 15011                                         | 3.7      |
| Murmur                                        | 13186                                         | 3.3      |
| Acute Coronary Syndrome                       | 12964                                         | 3.2      |
| ECG Abnormal                                  | 12040                                         | 3.0      |
| Cardiomyopathy                                | 9622                                          | 2.4      |
| Sepsis / Bacteremia / Endocarditis            | 8918                                          | 2.2      |
| Palpitations                                  | 8700                                          | 2.2      |
| Other Arrhythmia                              | 8422                                          | 2.1      |
| Edema                                         | 7459                                          | 1.9      |
| Other Valvular Disease                        | 7072                                          | 1.8      |
| Pericardial Disease                           | 6501                                          | 1.6      |
| Pre-op Exam                                   | 5583                                          | 1.4      |
| Aortic Disease                                | 3612                                          | 0.9      |
| Pulmonary Embolism                            | 3289                                          | 0.8      |
| Pulmonary Hypertension                        | 3242                                          | 0.8      |
| Dyslipidemia                                  | 2972                                          | 0.7      |
| Congenital Heart Disease                      | 2419                                          | 0.6      |
| Atrial Flutter                                | 2380                                          | 0.6      |
| Chemotherapy                                  | 2174                                          | 0.5      |
| Tricuspid Valve Disease                       | 1936                                          | 0.5      |



|                                          |       |     |
|------------------------------------------|-------|-----|
| Cardiac Arrest                           | 1809  | 0.5 |
| Family History of Cardiovascular Disease | 1793  | 0.4 |
| Fever                                    | 1638  | 0.4 |
| Ventricular Tachycardia                  | 1373  | 0.3 |
| Shock                                    | 1344  | 0.3 |
| Chronic Obstructive Pulmonary Disease    | 1268  | 0.3 |
| Hypotension                              | 1256  | 0.3 |
| Tachycardia                              | 1226  | 0.3 |
| Pulmonary Edema                          | 863   | 0.2 |
| Cardiac Contusion                        | 470   | 0.1 |
| Other                                    | 30618 | 7.6 |
| Unknown                                  | 35389 | 8.8 |

---

<sup>a</sup>Categories were defined by reviewing diagnoses which occurred in more than 0.1% of all the echocardiograms.

<sup>b</sup>The sum of the number of studies (or percentage) is larger than the total number of echocardiograms (or 100%) as an echocardiogram could have more than one indication.

**Table S5. Baseline Characteristics for the First Echocardiogram from Each Patient in the Primary Group**

| <b>Characteristic</b>             | <b>All Echoes<sup>a</sup><br/>No. (%)<br/>(N = 403977)</b> | <b>First Echo Only<br/>No. (%)<br/>(N = 203135)</b> |
|-----------------------------------|------------------------------------------------------------|-----------------------------------------------------|
| Age, mean (SD), y                 | 63.8 (15.9)                                                | 61.0 (16.9)                                         |
| Men                               | 208408 (52)                                                | 99981 (49)                                          |
| BMI, mean (SD), kg/m <sup>2</sup> | 30.5 (7.8)                                                 | 30.4 (8.0)                                          |
| Previous Myocardial Infarction    | 38085 (9)                                                  | 10010 (5)                                           |
| Hypertension                      | 196742 (49)                                                | 79852 (39)                                          |
| Diabetes Mellitus                 | 91464 (23)                                                 | 34541 (17)                                          |
| Atrial Fibrillation               | 65866 (16)                                                 | 18297 (9)                                           |
| Congenital Heart Defect           | 16110 (4)                                                  | 4700 (2)                                            |
| Dyslipidemia                      | 176109 (44)                                                | 68579 (34)                                          |
| Chronic Kidney Disease            | 55092 (14)                                                 | 14871 (7)                                           |
| Heart Failure                     | 52192 (13)                                                 | 10698 (5)                                           |
| Positive Smoking History          | 232951 (58)                                                | 112579 (55)                                         |
| <b>LVEF, mean (SD), %</b>         | <b>55.2 (11.1)</b>                                         | <b>56.6 (9.8)</b>                                   |
| Under 20                          | 5205 (1)                                                   | 1838 (1)                                            |
| 20 - 25                           | 7202 (2)                                                   | 2409 (1)                                            |
| 25 - 30                           | 8814 (2)                                                   | 2926 (1)                                            |
| 30 - 35                           | 9726 (2)                                                   | 3216 (2)                                            |
| 35 - 40                           | 10595 (3)                                                  | 3854 (2)                                            |
| 40 - 45                           | 14478 (4)                                                  | 5273 (3)                                            |
| 45 - 50                           | 15889 (4)                                                  | 6106 (3)                                            |
| 50 - 55                           | 41895 (10)                                                 | 19577 (10)                                          |
| 55 - 60                           | 138705 (34)                                                | 74839 (37)                                          |
| 60 - 65                           | 103433 (26)                                                | 57920 (29)                                          |
| 65 - 70                           | 34508 (9)                                                  | 18279 (9)                                           |
| Over 70                           | 13563 (3)                                                  | 6898 (3)                                            |

Abbreviations: BMI, body mass index; LVEF, left ventricular ejection fraction

<sup>a</sup>121,613 patients had exactly one echo; 38,406 had exactly two echoes; 43,116 had three or more echoes

**Table S6. Baseline Characteristics for each LVEF Interval in Patients with Heart Failure**

| Characteristic                                           | LVEF                          | LVEF                             | LVEF                             | LVEF                             | LVEF                             | LVEF                             | LVEF                             | LVEF                             | LVEF                             | LVEF                             | LVEF                             | LVEF                          |
|----------------------------------------------------------|-------------------------------|----------------------------------|----------------------------------|----------------------------------|----------------------------------|----------------------------------|----------------------------------|----------------------------------|----------------------------------|----------------------------------|----------------------------------|-------------------------------|
|                                                          | < 20<br>No. (%)<br>(N = 2111) | 20 - 25<br>No. (%)<br>(N = 2579) | 25 - 30<br>No. (%)<br>(N = 2830) | 30 - 35<br>No. (%)<br>(N = 2775) | 35 - 40<br>No. (%)<br>(N = 2570) | 40 - 45<br>No. (%)<br>(N = 2953) | 45 - 50<br>No. (%)<br>(N = 2836) | 50 - 55<br>No. (%)<br>(N = 4882) | 55 - 60<br>No. (%)<br>(N = 8362) | 60 - 65<br>No. (%)<br>(N = 5273) | 65 - 70<br>No. (%)<br>(N = 2317) | ≥ 70<br>No. (%)<br>(N = 1128) |
| No. of Unique Patients <sup>a</sup>                      | 1551                          | 2029                             | 2268                             | 2272                             | 2136                             | 2438                             | 2343                             | 3938                             | 6205                             | 4113                             | 1982                             | 947                           |
| Age, mean (SD), y                                        | 67.5 (13.7)                   | 70.0 (13.0)                      | 70.7 (12.6)                      | 70.4 (13.0)                      | 71.3 (13.0)                      | 71.8 (12.7)                      | 71.7 (12.9)                      | 72.5 (12.9)                      | 73.1 (12.8)                      | 73.9 (12.4)                      | 75.0 (11.9)                      | 75.4 (12.4)                   |
| Male Sex                                                 | 1534 (73)                     | 1801 (70)                        | 1933 (68)                        | 1815 (65)                        | 1672 (65)                        | 1832 (62)                        | 1699 (60)                        | 2510 (51)                        | 3752 (45)                        | 2039 (39)                        | 748 (32)                         | 319 (28)                      |
| BMI, mean (SD), kg/m <sup>2</sup>                        | 29.0 (7.4)                    | 29.3 (6.7)                       | 29.6 (7.2)                       | 30.0 (7.8)                       | 30.1 (7.2)                       | 30.2 (7.2)                       | 30.7 (7.7)                       | 31.5 (8.4)                       | 32.2 (8.7)                       | 32.3 (9.0)                       | 32.3 (9.3)                       | 31.4 (9.7)                    |
| Previous Myocardial Infarction                           | 589 (28)                      | 840 (33)                         | 926 (33)                         | 874 (31)                         | 820 (32)                         | 878 (30)                         | 722 (25)                         | 958 (20)                         | 1202 (14)                        | 608 (12)                         | 263 (11)                         | 156 (14)                      |
| Hypertension                                             | 1164 (55)                     | 1563 (61)                        | 1786 (63)                        | 1818 (66)                        | 1755 (68)                        | 2031 (69)                        | 2009 (71)                        | 3537 (72)                        | 6233 (75)                        | 4020 (76)                        | 1816 (78)                        | 890 (79)                      |
| Diabetes Mellitus                                        | 817 (39)                      | 1112 (43)                        | 1286 (45)                        | 1217 (44)                        | 1130 (44)                        | 1228 (42)                        | 1236 (44)                        | 2109 (43)                        | 3570 (43)                        | 2259 (43)                        | 1013 (44)                        | 464 (41)                      |
| Atrial Fibrillation                                      | 732 (35)                      | 916 (36)                         | 1056 (37)                        | 1087 (39)                        | 995 (39)                         | 1270 (43)                        | 1249 (44)                        | 2227 (46)                        | 3805 (46)                        | 2274 (43)                        | 968 (42)                         | 484 (43)                      |
| Congenital Heart Defect                                  | 40 (2)                        | 58 (2)                           | 68 (2)                           | 67 (2)                           | 66 (3)                           | 93 (3)                           | 82 (3)                           | 179 (4)                          | 322 (4)                          | 203 (4)                          | 84 (4)                           | 38 (3)                        |
| Dyslipidemia                                             | 1142 (54)                     | 1490 (58)                        | 1684 (60)                        | 1644 (59)                        | 1552 (60)                        | 1796 (61)                        | 1781 (63)                        | 3010 (62)                        | 4958 (59)                        | 3137 (59)                        | 1403 (61)                        | 697 (62)                      |
| Chronic Kidney Disease                                   | 714 (34)                      | 906 (35)                         | 1050 (37)                        | 1002 (36)                        | 940 (37)                         | 1091 (37)                        | 1094 (39)                        | 1094 (39)                        | 3222 (39)                        | 2025 (38)                        | 948 (41)                         | 458 (41)                      |
| Positive Smoking History                                 | 1478 (70)                     | 1806 (70)                        | 1936 (68)                        | 1874 (68)                        | 1707 (66)                        | 1932 (65)                        | 1853 (65)                        | 3011 (62)                        | 5078 (61)                        | 3005 (57)                        | 1267 (55)                        | 648 (57)                      |
| ACEi or ARB                                              | 1174 (56)                     | 1423 (55)                        | 1458 (52)                        | 1440 (52)                        | 1265 (49)                        | 1362 (46)                        | 1253 (44)                        | 1888 (39)                        | 2871 (34)                        | 1772 (34)                        | 773 (33)                         | 349 (31)                      |
| β-blocker                                                | 1276 (60)                     | 1484 (58)                        | 1507 (53)                        | 1407 (51)                        | 1277 (50)                        | 1305 (44)                        | 1159 (41)                        | 1631 (33)                        | 2371 (28)                        | 1374 (26)                        | 581 (25)                         | 319 (28)                      |
| Loop Diuretics                                           | 1551 (73)                     | 1801 (70)                        | 1869 (66)                        | 1761 (63)                        | 1564 (61)                        | 1806 (61)                        | 1677 (59)                        | 2896 (59)                        | 4803 (57)                        | 2989 (57)                        | 1372 (59)                        | 679 (60)                      |
| MCRA                                                     | 617 (29)                      | 569 (22)                         | 538 (19)                         | 423 (15)                         | 385 (15)                         | 357 (12)                         | 269 (9)                          | 485 (10)                         | 643 (8)                          | 433 (8)                          | 177 (7)                          | 88 (8)                        |
| Digoxin                                                  | 654 (31)                      | 638 (25)                         | 517 (18)                         | 389 (14)                         | 364 (14)                         | 347 (12)                         | 318 (11)                         | 532 (11)                         | 746 (9)                          | 437 (8)                          | 208 (9)                          | 110 (10)                      |
| Dobutamine                                               | 24 (1)                        | 11 (0)                           | 8 (0)                            | 8 (0)                            | 2 (0)                            | 2 (0)                            | 6 (0)                            | 5 (0)                            | 14 (0)                           | 15 (0)                           | 11 (0)                           | 5 (0)                         |
| Dopamine                                                 | 64 (3)                        | 56 (2)                           | 53 (2)                           | 41 (1)                           | 35 (1)                           | 30 (1)                           | 25 (1)                           | 44 (1)                           | 56 (1)                           | 37 (1)                           | 14 (1)                           | 18 (2)                        |
| Ephedrine                                                | 9 (0)                         | 7 (0)                            | 9 (0)                            | 11 (0)                           | 12 (0)                           | 17 (1)                           | 12 (0)                           | 27 (1)                           | 41 (0)                           | 30 (1)                           | 15 (1)                           | 21 (2)                        |
| Epinephrine                                              | 25 (1)                        | 17 (1)                           | 21 (1)                           | 14 (1)                           | 12 (0)                           | 7 (0)                            | 13 (0)                           | 32 (1)                           | 32 (0)                           | 12 (0)                           | 9 (0)                            | 9 (1)                         |
| Isoproterenol                                            | 1 (0)                         | 0 (0)                            | 0 (0)                            | 0 (0)                            | 0 (0)                            | 0 (0)                            | 1 (0)                            | 2 (0)                            | 0 (0)                            | 2 (0)                            | 0 (0)                            | 0 (0)                         |
| Milrinone                                                | 94 (4)                        | 58 (2)                           | 43 (2)                           | 23 (1)                           | 17 (1)                           | 12 (0)                           | 9 (0)                            | 10 (0)                           | 17 (0)                           | 4 (0)                            | 1 (0)                            | 10 (1)                        |
| Norepinephrine                                           | 81 (4)                        | 66 (3)                           | 70 (2)                           | 56 (2)                           | 29 (1)                           | 31 (1)                           | 41 (1)                           | 49 (1)                           | 85 (1)                           | 38 (1)                           | 23 (1)                           | 36 (3)                        |
| Phenylephrine                                            | 74 (4)                        | 71 (3)                           | 64 (2)                           | 59 (2)                           | 53 (2)                           | 58 (2)                           | 43 (2)                           | 87 (2)                           | 136 (2)                          | 95 (2)                           | 49 (2)                           | 68 (6)                        |
| Vasopressin                                              | 9 (0)                         | 3 (0)                            | 3 (0)                            | 4 (0)                            | 2 (0)                            | 2 (0)                            | 2 (0)                            | 3 (0)                            | 6 (0)                            | 1 (0)                            | 1 (0)                            | 2 (0)                         |
| Septal Thickness, mean (SD), mm                          | 10.4 (2.6)                    | 10.9 (2.8)                       | 11.2 (2.7)                       | 11.6 (2.7)                       | 11.9 (2.7)                       | 12.0 (2.8)                       | 12.0 (2.7)                       | 12.0 (2.6)                       | 12.0 (2.6)                       | 12.2 (2.7)                       | 12.6 (2.8)                       | 13.4 (3.4)                    |
| Posterior Wall Thickness, mean (SD), mm                  | 10.3 (2.4)                    | 10.5 (2.5)                       | 10.7 (2.4)                       | 11.0 (2.4)                       | 11.1 (2.4)                       | 11.2 (2.4)                       | 11.3 (2.3)                       | 11.4 (2.3)                       | 11.4 (2.3)                       | 11.5 (2.3)                       | 11.8 (2.4)                       | 12.3 (2.7)                    |
| End Diastolic Volume Index, mean (SD), mL/m <sup>2</sup> | 109.4 (40.2)                  | 93.3 (31.3)                      | 83.4 (26.7)                      | 75.7 (24.8)                      | 70.1 (22.3)                      | 64.9 (20.4)                      | 60.7 (19.3)                      | 53.7 (17.8)                      | 49.3 (16.7)                      | 47.2 (16.4)                      | 43.6 (15.6)                      | 39.7 (15.1)                   |

<sup>a</sup>The sum of the number of unique patients across the LVEF intervals is larger than the overall number of unique patients because patients with multiple echocardiograms can appear in multiple LVEF intervals  
Abbreviations: BMI, body mass index calculated as weight in kilograms divided by height in meters squared; LVEF, left ventricular ejection fraction; ACEi, angiotensin converting enzyme inhibitors; ARB, angiotensin II receptor blockers, MCRA, mineralocorticoid receptor antagonists
